# Supplementary material for: Synthesis, crystal growth, and characterization of the orthorhombic BaTeW2O9: a new polymorph of BaTeW2O9
Source: Royal Society of Chemistry journal article supplement (doi:10.1039/c3ce41272e), 2013-01-01
Supplement: c3ce41272e.pdf [file c3ce41272e.pdf]

Supporting Information for:

## Synthesis, Crystal Growth, and Characterization of the Orthorhombic BaTeW<sub>2</sub>O<sub>9</sub>: A New Polymorph of BaTeW<sub>2</sub>O<sub>9</sub>

Zhonghan Zhang, Xutang Tao\*, Junjie Zhang, Youxuan Sun, Chengqian Zhang, Bo Li

State Key Laboratory of Crystal Materials, Shandong University, Jinan 250100, Shandong, China

\* E-mail address: txt@sdu.edu.cn

**Figure S1.** (a) Powder X-ray diffraction pattern of synthesized polycrystalline of orthorhombic BaTeW<sub>2</sub>O<sub>9</sub>(BTW). Calculated pattern was shown for comparison. (b) X-ray diffraction pattern of powder obtained by grounding a small piece of single crystal of orthorhombic BTW.

**Figure S2.** The UV-vis diffuse reflectance spectrum of the powder of Orthorhombic BTW. The up right shows the  $(\nu h\nu)^2-(h\nu)$  curve.

**Figure S3.** Raman Spectrum of orthorhombic BTW. The Raman shift with the highest intensity is at 910.93 cm<sup>-1</sup>.

**Figure S4.** Differential Scanning Calorimetry (DSC) and Thermogravimetric Analysis (TGA) data of orthorhombic BTW.

**Figure S5.** PXRD pattern of the residue after DSC and TGA measurement.

**Figure S6.** Thermal Properties of orthorhombic BTW. (a)The thermal diffusion vs. temperature curves. (b)Thermal expansion vs. temperature curves. The left-up inset shows the temperature depended density of the crystal. (c) The specific heat of the crystal vs. temperature curve. (d) The thermal conductivity vs. temperature curves.

(a)

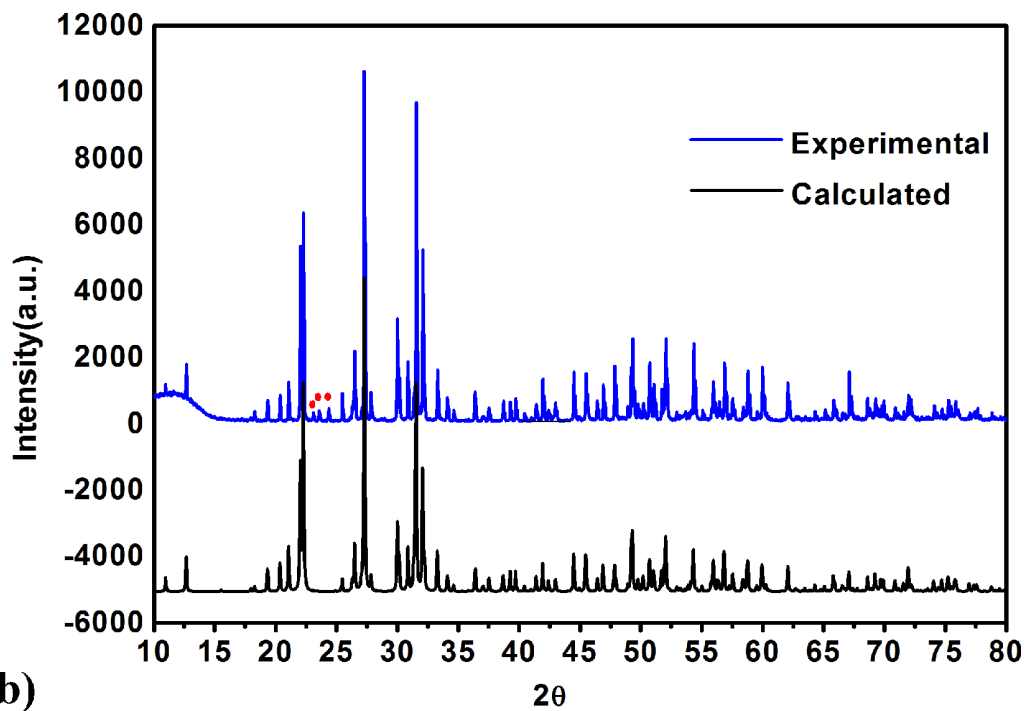

(b)

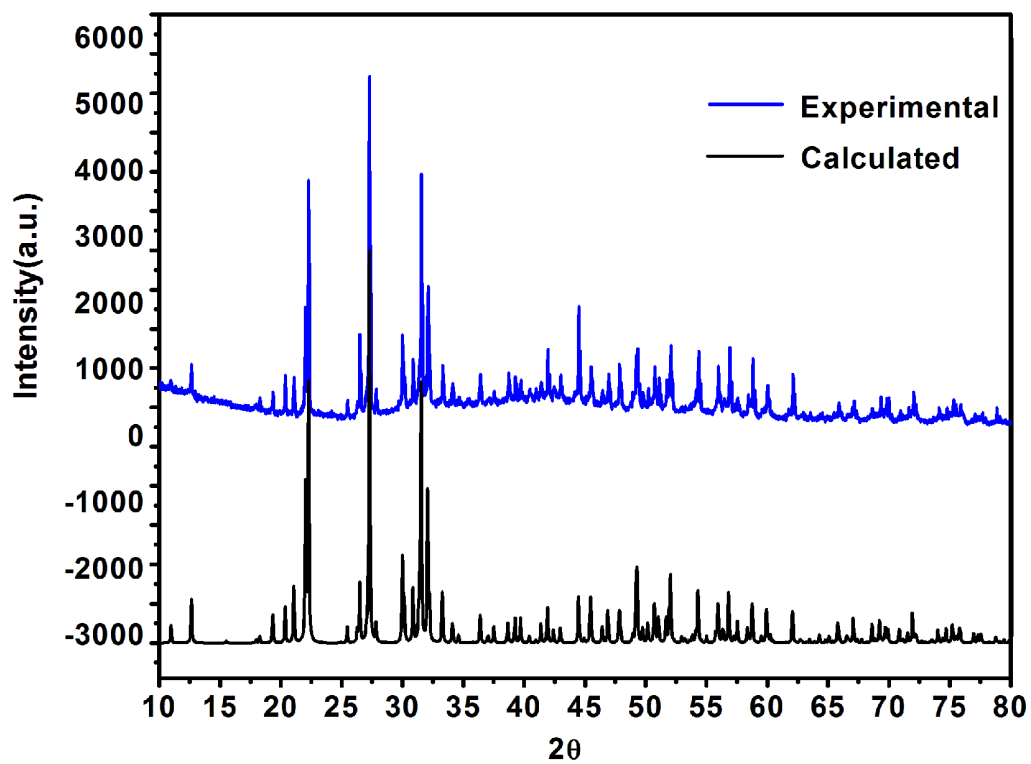

**Figure S1.** (a) Powder X-ray diffraction pattern of synthesized polycrystalline of orthorhombic BTW. Calculated pattern was shown for comparison. Note that there are three impurity's peaks labored by yellow points. (b) X-ray diffraction pattern of powder obtained by grounding a small piece of single crystal of orthorhombic BTW.

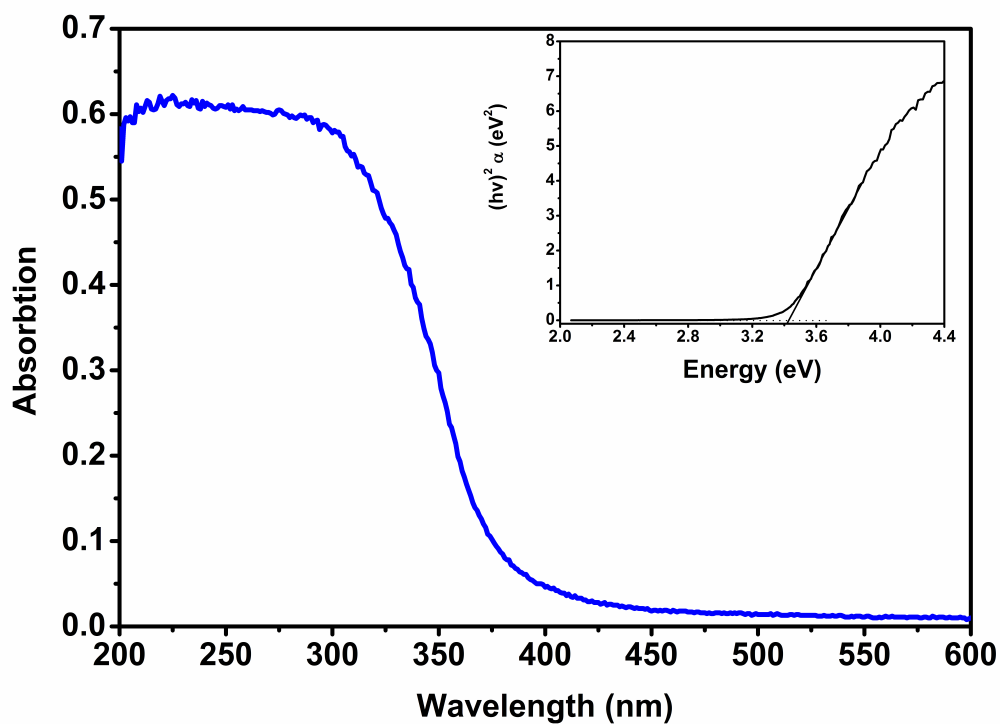

**Figure S2.** The UV-vis diffuse reflectance spectrum of the powder of Orthorhombic BTW. The up right shows the  $(\nu h \alpha)^2 - (h\nu)$  curve.

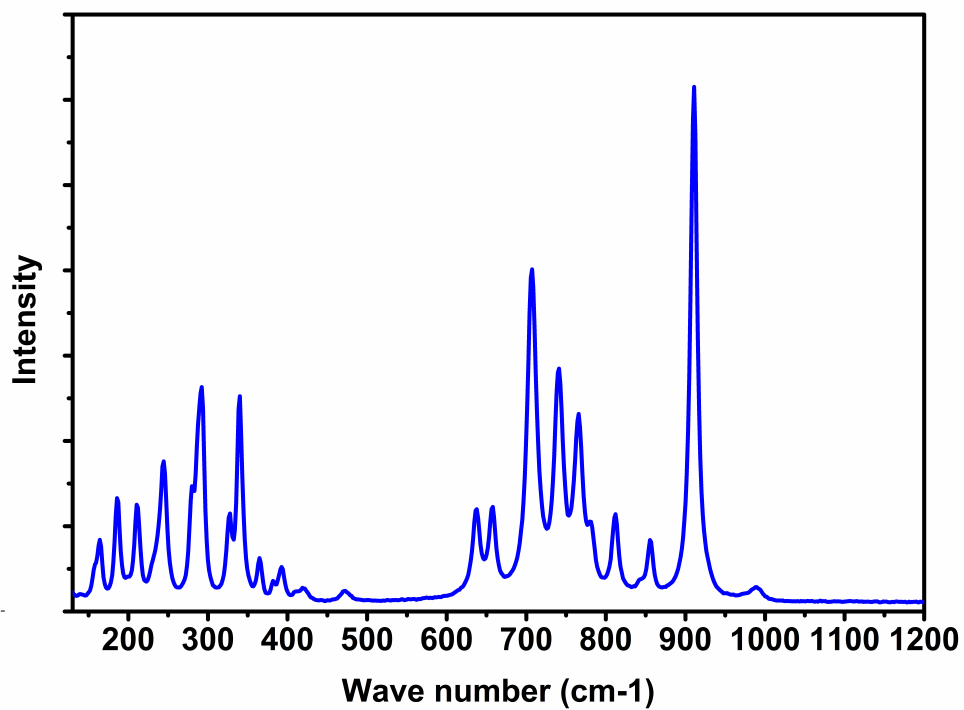

**Figure S3.** Raman Spectrum of orthorhombic BTW. The Raman shift with the highest intensity is at 910.93 cm-1.

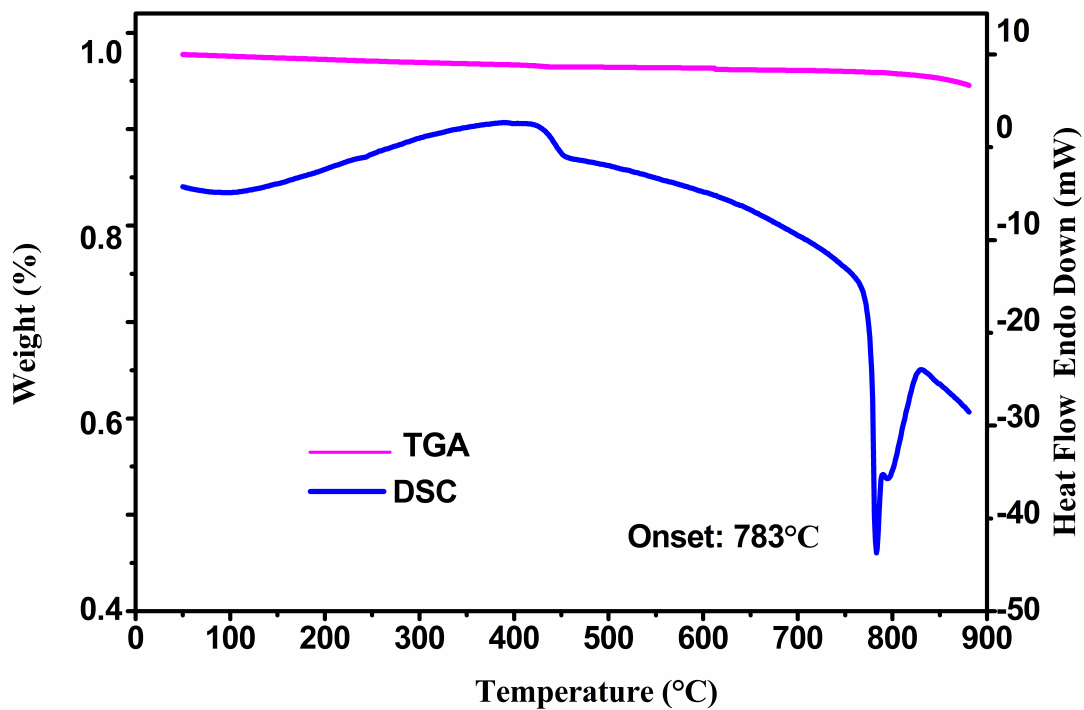

**Figure S4.** Differential Scanning Calorimetry (DSC) and Thermogravimetric Analysis (TGA) data of orthorhombic BTW. The onset temperature was indicated. Note that there is only one endothermic peak on the heating curve of DSC and no weight loss on the curve of TGA.

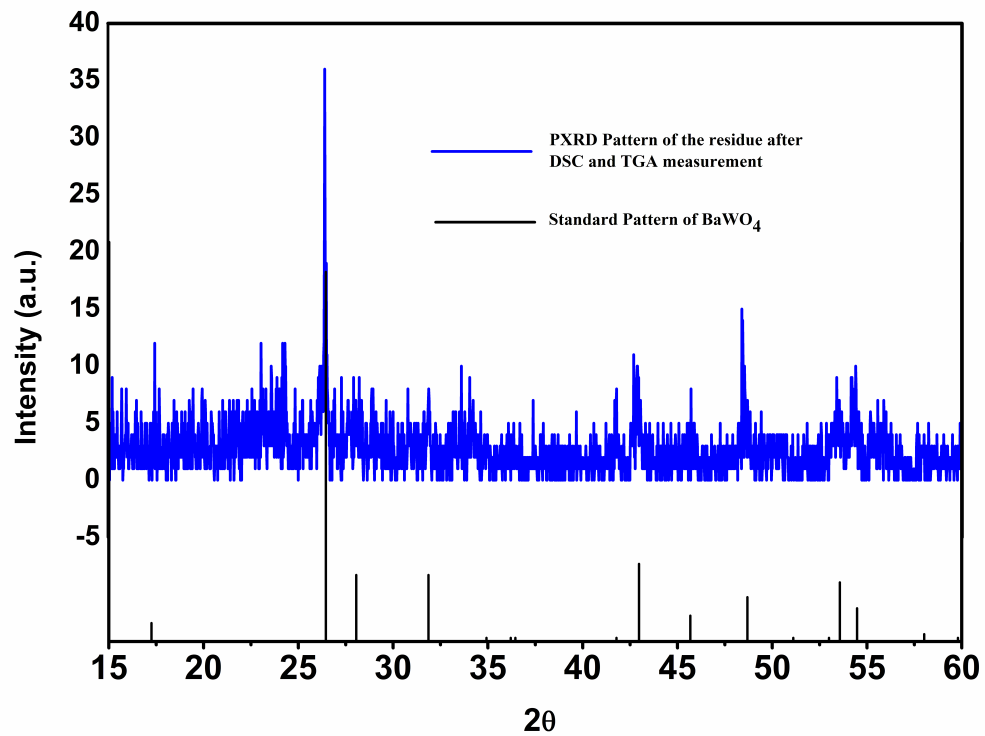

**Figure S5.** PXRD pattern of the residue after DSC and TGA measurements. The result indicated that the crystal deposited to be BaWO<sub>4</sub> and some amorphous phase.

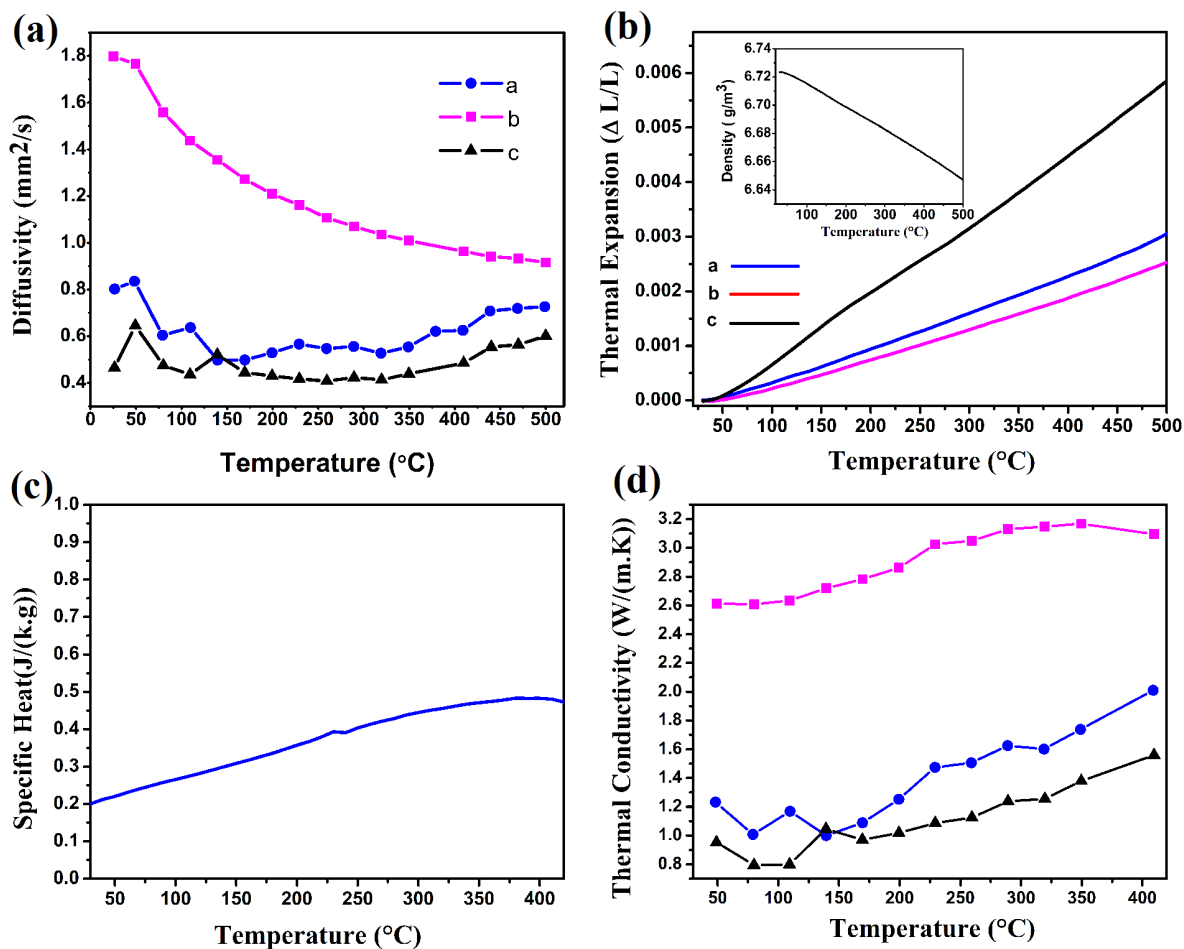

**Figure S6.** Thermal Properties of orthorhombic BTW. (a) The thermal diffusion vs. temperature curves. (b) Thermal expansion vs. temperature curves. The left-up inset shows the temperature depended density of the crystal. (c) The specific heat of the crystal vs. temperature curve. (d) The thermal conductivity vs. temperature curves.
